# Supplementary material for: Significant Association of Estrogen Receptor Binding Site Variation with Bipolar Disorder in Females
Source: PLoS One. 2012 Feb 28;7(2):e32304. doi: 10.1371/journal.pone.0032304 (PMC3289647; doi:10.1371/journal.pone.0032304)
Supplement: Table S2 — Association results for the male bipolar disorder material. (XLS) [file pone.0032304.s002.xls]

## Sheet: BP male
Table S2: Association results for the male bipolar disorder material.
rs-number	chr1	position (bp)2	minor allele	major allele	MAF (cases)3	MAF (controls)4	p-value	OR5	L956	U957
rs6517590	21	40618105	A	G	0.4906	0.427	0.005008	1.292	1.082	1.543
rs12551010	9	113814412	T	C	0.07233	0.04528	0.0122	1.644	1.12	2.414
rs32489	5	55634181	C	T	0.3312	0.2795	0.01429	1.277	1.053	1.547
rs2040525	7	88496056	C	G	0.2362	0.1919	0.01756	1.302	1.048	1.617
rs7712260	5	90551280	G	C	0.07547	0.05118	0.03242	1.513	1.047	2.187
rs11699805	20	46141073	G	A	0.4937	0.4469	0.03787	1.207	1.011	1.441
rs9382944	6	14331082	G	A	0.1282	0.09961	0.04667	1.329	1.004	1.758
rs16998132	20	51541073	C	T	0.06604	0.04528	0.04854	1.491	1.009	2.204
rs16880195	6	18196584	G	A	0.07862	0.1043	0.05115	0.7325	0.5373	0.9986
rs1369528	2	142358098	C	T	0.443	0.4875	0.05304	0.8361	0.6977	1.002
rs4760609	12	46702024	A	C	0.2174	0.2549	0.05608	0.8121	0.659	1.001
rs6721609	2	216866986	T	C	0.08947	0.1154	0.06319	0.7534	0.5612	1.011
rs10804226	2	214951988	T	C	0.3218	0.3622	0.06395	0.8355	0.6933	1.007
rs7047840	9	109934110	C	T	0.2411	0.2061	0.06557	1.224	0.9893	1.513
rs17154942	5	102380617	C	T	0.3176	0.2801	0.07592	1.196	0.9861	1.452
rs7721781	5	66568676	C	T	0.08439	0.1086	0.07815	0.7568	0.5588	1.025
rs867286	2	45835534	A	G	0.304	0.3415	0.08272	0.842	0.6968	1.018
rs1641107	16	8680078	T	C	0.3538	0.3916	0.08982	0.8506	0.7069	1.024
rs10236615	7	101402325	C	G	0.1751	0.2051	0.09587	0.8223	0.6559	1.031
rs1603931	4	133666863	G	A	0.4801	0.4428	0.1034	1.162	0.973	1.388
rs3212528	5	52388971	T	C	0.08281	0.1043	0.1051	0.7751	0.5709	1.052
rs2426669	20	54743531	T	A	0.3197	0.3543	0.1054	0.8564	0.7102	1.033
rs7021194	9	2459764	C	G	0.1197	0.1447	0.1106	0.8042	0.6186	1.045
rs1333689	10	116380465	T	C	0.07895	0.1002	0.1137	0.7697	0.5629	1.052
rs6023059	20	36171185	C	T	0.4612	0.497	0.1145	0.8662	0.7257	1.034
rs1011454	5	102396154	G	A	0.327	0.2943	0.1191	1.165	0.9627	1.411
rs2682323	12	51649282	A	C	0.4232	0.3886	0.1291	1.154	0.9639	1.382
rs4673821	2	214952060	T	C	0.4723	0.4376	0.1329	1.15	0.962	1.375
rs17028882	3	32128395	A	T	0.1242	0.1026	0.1347	1.241	0.938	1.642
rs11917336	3	172452824	T	G	0.4915	0.4574	0.1347	1.147	0.9597	1.37
rs3852286	7	140319903	C	G	0.2055	0.2333	0.1418	0.8499	0.6862	1.053
rs10987379	9	128444825	C	T	0.08755	0.06972	0.1524	1.28	0.9193	1.783
rs6022537	20	36099124	C	T	0.1488	0.1722	0.1589	0.8404	0.6601	1.07
rs9904292	17	57232766	C	T	0.2642	0.2362	0.1598	1.161	0.9464	1.424
rs8014434	14	95602064	C	T	0.2191	0.2461	0.1657	0.8596	0.6971	1.06
rs11907750	20	46890421	C	G	0.2134	0.1875	0.1706	1.175	0.9397	1.47
rs10766361	11	16934867	T	C	0.38	0.4101	0.1796	0.8819	0.7354	1.058
rs351293	5	154428597	T	C	0.4371	0.4071	0.1853	1.131	0.9454	1.353
rs7220688	17	57155569	C	G	0.2558	0.2303	0.1892	1.148	0.9346	1.411
rs2067833	6	53438315	G	A	0.3616	0.3907	0.1928	0.8833	0.7359	1.06
rs17568485	14	71339400	T	C	0.4025	0.374	0.1956	1.128	0.9405	1.352
rs7608401	2	238125410	A	G	0.1321	0.1529	0.1976	0.8433	0.6543	1.087
rs12931084	16	73645940	C	T	0.07097	0.08709	0.2038	0.8007	0.5729	1.119
rs590884	6	161298182	C	T	0.3994	0.3711	0.211	1.127	0.9398	1.351
rs10895097	11	100711952	G	A	0.196	0.2185	0.222	0.872	0.7009	1.085
rs11650471	17	57059717	T	C	0.2553	0.2313	0.2265	1.139	0.9269	1.4
rs10952362	7	151893731	C	T	0.1421	0.1624	0.2331	0.8543	0.6674	1.094
rs11238891	10	43990998	A	C	0.09349	0.1102	0.2337	0.8324	0.6207	1.116
rs7306790	12	51650281	C	T	0.4536	0.426	0.2367	1.118	0.9356	1.337
rs8128036	21	35022791	A	T	0.4546	0.4279	0.2369	1.115	0.9325	1.333
rs6005907	22	27557971	T	C	0.06394	0.05118	0.245	1.266	0.8652	1.854
rs6743733	2	180219874	C	T	0.2547	0.2318	0.2474	1.133	0.9219	1.392
rs10895098	11	100712411	T	C	0.1771	0.1978	0.2487	0.8729	0.6958	1.095
rs6870707	5	172895420	A	G	0.2846	0.2619	0.263	1.121	0.9185	1.369
rs1203785	4	2396440	A	G	0.1488	0.1677	0.2666	0.8682	0.6811	1.107
rs2823131	21	15489599	A	G	0.3372	0.313	0.268	1.117	0.9245	1.349
rs16942741	15	87482020	C	T	0.1964	0.1762	0.2707	1.143	0.9107	1.435
rs6685891	1	175769969	A	C	0.4434	0.4183	0.2746	1.108	0.9267	1.324
rs2646355	4	55396898	C	T	0.4644	0.439	0.277	1.108	0.9277	1.323
rs444242	8	23707647	T	G	0.3941	0.4183	0.2912	0.9046	0.7556	1.083
rs827945	20	46220900	C	T	0.4653	0.4891	0.2984	0.9092	0.7614	1.086
rs7225914	17	73919964	A	G	0.178	0.1602	0.3008	1.135	0.8941	1.442
rs7302323	12	61862861	T	A	0.1509	0.1339	0.3017	1.15	0.8932	1.482
rs744418	5	56000598	G	A	0.1734	0.1911	0.318	0.8874	0.7044	1.118
rs210946	6	135574977	G	T	0.4927	0.4694	0.3207	1.098	0.9195	1.31
rs11168359	12	46702290	T	C	0.1426	0.127	0.3221	1.143	0.8824	1.481
rs16864578	2	177419686	T	C	0.05158	0.06238	0.3307	0.8175	0.5566	1.201
rs4719480	7	16801076	C	A	0.1405	0.1565	0.342	0.8808	0.6867	1.13
rs7845203	8	8182850	A	G	0.3971	0.4183	0.3587	0.9158	0.7649	1.096
rs1075420	5	56000812	A	G	0.2348	0.2165	0.3591	1.11	0.8987	1.372
rs12830815	12	52483533	T	C	0.4591	0.4803	0.3664	0.9184	0.7694	1.096
rs2386644	10	5742226	T	C	0.4853	0.4645	0.3665	1.087	0.9107	1.298
rs1697139	5	66547291	A	G	0.4895	0.4685	0.3669	1.088	0.9115	1.298
rs12023402	1	160518972	G	C	0.2463	0.2283	0.3676	1.105	0.8973	1.359
rs17396153	8	102548378	A	T	0.1803	0.1644	0.3705	1.118	0.8849	1.413
rs12062396	1	15417145	T	C	0.1698	0.186	0.3769	0.895	0.7101	1.128
rs2056480	7	1920827	A	G	0.3805	0.4006	0.3801	0.9191	0.7667	1.102
rs3768605	1	181445252	C	T	0.192	0.1765	0.3825	1.108	0.882	1.393
rs4823046	22	28265773	G	A	0.1646	0.1496	0.3856	1.12	0.8782	1.428
rs6918485	6	15145231	A	G	0.4361	0.4557	0.3891	0.9235	0.7731	1.103
rs351292	5	154428456	G	T	0.2857	0.2677	0.3913	1.094	0.8979	1.333
rs10743001	11	1774545	T	G	0.4916	0.4715	0.3914	1.084	0.9084	1.294
rs2762932	20	52201798	C	T	0.1426	0.1289	0.3923	1.123	0.8677	1.454
rs6435822	2	214951740	A	T	0.1432	0.1297	0.3925	1.121	0.866	1.451
rs4980206	10	125471853	G	A	0.2736	0.2913	0.395	0.9161	0.7527	1.115
rs2204988	14	21811946	A	G	0.2288	0.2456	0.3955	0.9116	0.7399	1.123
rs12543293	8	88744669	T	C	0.2149	0.2303	0.417	0.9147	0.7395	1.131
rs13014394	2	216555810	A	G	0.2191	0.2352	0.4199	0.912	0.7385	1.126
rs2797178	1	116159496	C	A	0.4078	0.3898	0.4338	1.078	0.9	1.291
rs9910688	17	69058311	A	G	0.1187	0.1075	0.4341	1.118	0.8457	1.479
rs12947510	17	59758074	G	A	0.1216	0.1102	0.4391	1.117	0.8477	1.473
rs4871389	8	124650394	C	T	0.1817	0.1677	0.4396	1.103	0.8734	1.392
rs2887146	3	195358515	C	T	0.07428	0.08417	0.4455	0.8731	0.6249	1.22
rs2344922	16	76642909	C	G	0.3616	0.3445	0.4504	1.078	0.896	1.297
rs6430628	2	136810048	C	T	0.1471	0.1598	0.453	0.9068	0.7092	1.159
rs7299135	12	46700211	A	G	0.3927	0.4105	0.4533	0.9287	0.7728	1.116
rs9355112	6	169082073	A	G	0.1813	0.1949	0.4539	0.9151	0.7298	1.148
rs6427195	1	167747800	T	A	0.0608	0.06988	0.4661	0.8616	0.6019	1.233
rs7075880	10	95184928	C	T	0.1646	0.1772	0.4729	0.9149	0.7233	1.157
rs477026	11	30424400	A	G	0.07353	0.06522	0.4781	1.138	0.8028	1.612
rs7548516	1	149246905	C	T	0.2393	0.2251	0.4796	1.083	0.8748	1.34
rs4757881	11	20010143	G	A	0.1929	0.1801	0.4874	1.088	0.8669	1.365
rs9839229	3	189483319	T	C	0.3847	0.4006	0.4888	0.9355	0.7806	1.121
rs6916360	6	154532716	C	G	0.06947	0.07791	0.4908	0.8836	0.6292	1.241
rs1710288	10	127731276	G	C	0.4025	0.4183	0.492	0.9368	0.7828	1.121
rs2587871	16	54970027	T	C	0.4382	0.4222	0.4947	1.067	0.8926	1.276
rs11711695	3	162540287	G	A	0.3255	0.3109	0.4953	1.07	0.8836	1.295
rs1513167	3	118487491	C	T	0.4885	0.4724	0.4986	1.066	0.8935	1.273
rs1434654	5	136505991	A	G	0.09958	0.1093	0.5067	0.9016	0.6745	1.205
rs7091625	10	95184701	T	C	0.1656	0.1772	0.5111	0.9219	0.729	1.166
rs274567	5	131742308	T	C	0.4025	0.3878	0.5187	1.064	0.8877	1.274
rs6063219	20	46220921	C	A	0.2458	0.2333	0.5262	1.071	0.8708	1.318
rs1413683	10	8804953	G	C	0.2048	0.2165	0.5433	0.932	0.7503	1.158
rs827941	20	46225643	A	G	0.2883	0.2756	0.5478	1.065	0.8748	1.296
rs2074948	22	28237850	T	G	0.2111	0.2224	0.5478	0.9356	0.7548	1.16
rs2147265	9	113815244	T	C	0.3157	0.303	0.5534	1.061	0.8743	1.288
rs16945848	15	60913837	A	G	0.09979	0.1083	0.5554	0.913	0.6832	1.22
rs4580515	3	114737833	T	C	0.0891	0.08169	0.5728	1.1	0.8014	1.509
rs343992	3	158012864	T	C	0.1223	0.1133	0.5735	1.091	0.8278	1.437
rs4362470	18	41627762	C	T	0.3648	0.3775	0.5753	0.9471	0.7886	1.137
rs1710287	10	127731180	A	G	0.4394	0.4264	0.5828	1.054	0.8809	1.261
rs10517198	4	47400335	T	C	0.1184	0.127	0.5832	0.9239	0.7056	1.21
rs2655216	3	13493188	G	A	0.4305	0.4429	0.5854	0.9509	0.7955	1.137
rs709487	3	109183738	A	T	0.4748	0.4626	0.5881	1.05	0.8799	1.254
rs4752759	11	1774671	A	G	0.2285	0.2392	0.5946	0.9422	0.7646	1.161
rs8059305	16	66594167	C	A	0.1374	0.1289	0.595	1.076	0.8294	1.397
rs913670	20	48339923	A	G	0.333	0.3453	0.5979	0.9465	0.7842	1.142
rs12420058	11	68438569	C	A	0.2591	0.2485	0.6017	1.058	0.862	1.298
rs2250580	10	104495677	G	C	0.2754	0.2646	0.6071	1.056	0.8634	1.292
rs6091723	20	51711665	A	G	0.3973	0.4094	0.6133	0.9507	0.7939	1.138
rs356143	9	96585635	C	T	0.109	0.1171	0.6185	0.9223	0.6975	1.219
rs7111951	11	19973135	T	C	0.1097	0.1174	0.6187	0.9268	0.7009	1.225
rs2608038	8	129222414	C	T	0.1111	0.1183	0.6213	0.9313	0.7055	1.229
rs11593940	10	8204605	A	G	0.1122	0.12	0.6219	0.9261	0.7023	1.221
rs351294	5	154428932	A	G	0.08491	0.07874	0.6226	1.086	0.7864	1.499
rs2804889	10	33681870	T	C	0.1226	0.1304	0.635	0.9319	0.7141	1.216
rs7901847	10	8204221	A	G	0.4015	0.4124	0.6464	0.9557	0.7984	1.144
rs4776644	15	61976270	G	A	0.4686	0.4792	0.6515	0.958	0.8025	1.144
rs4955878	3	55780487	T	C	0.1502	0.1578	0.662	0.9435	0.7383	1.206
rs12890124	14	67851367	C	A	0.355	0.3449	0.6701	1.046	0.8687	1.259
rs12694546	2	221384927	G	A	0.2405	0.2322	0.6707	1.047	0.85	1.29
rs10008749	4	40060307	C	G	0.3627	0.372	0.6741	0.9605	0.7996	1.154
rs7153145	14	90812411	G	A	0.1237	0.1174	0.6781	1.062	0.8092	1.393
rs7999417	13	22451518	T	C	0.4203	0.4104	0.6806	1.042	0.8706	1.246
rs17588404	15	94227043	C	T	0.4242	0.4338	0.6814	0.9616	0.8041	1.15
rs1078272	21	42669982	T	A	0.4266	0.4359	0.6822	0.9629	0.8055	1.151
rs827949	20	46220623	C	T	0.4537	0.4635	0.6835	0.9612	0.8048	1.148
rs3757163	6	136916144	G	A	0.1416	0.1345	0.6923	1.062	0.8202	1.375
rs10482869	21	15494308	A	G	0.09224	0.08661	0.693	1.072	0.7862	1.461
rs7216716	17	62894317	T	C	0.1365	0.1436	0.6942	0.9426	0.7289	1.219
rs2277509	14	90819348	G	T	0.3134	0.3051	0.6966	1.04	0.8587	1.259
rs12069336	1	160395958	C	T	0.1583	0.1516	0.7086	1.053	0.8245	1.344
rs4876621	8	116948684	A	C	0.06813	0.06398	0.7175	1.07	0.7495	1.527
rs914494	9	2459939	C	T	0.2626	0.2707	0.7211	0.9596	0.7857	1.172
rs4815295	20	24578360	A	G	0.3046	0.2972	0.7308	1.036	0.8541	1.256
rs11591672	10	91707928	T	C	0.3197	0.3274	0.7359	0.9654	0.7991	1.166
rs1555439	20	52242703	A	C	0.2017	0.2087	0.7376	0.9581	0.7697	1.193
rs10829295	10	27957130	T	C	0.07799	0.083	0.7384	0.9346	0.6733	1.297
rs12068421	1	160396170	T	C	0.1342	0.1398	0.7433	0.9538	0.7375	1.233
rs4527365	3	189484074	T	C	0.3669	0.3745	0.7438	0.9678	0.8059	1.162
rs1182389	7	156731564	T	C	0.3658	0.373	0.744	0.9696	0.8073	1.164
rs212544	1	21479370	T	C	0.08985	0.09462	0.7544	0.9446	0.6948	1.284
rs11732564	4	40060233	A	G	0.2589	0.2658	0.7583	0.965	0.7892	1.18
rs11079336	17	53328720	T	G	0.303	0.2962	0.7661	1.033	0.8504	1.254
rs2964942	7	47473614	G	C	0.3211	0.3278	0.7725	0.9699	0.8029	1.172
rs889310	5	56000924	C	T	0.4151	0.4085	0.7835	1.028	0.8588	1.23
rs729663	20	46737713	C	T	0.4466	0.4531	0.7841	0.974	0.8143	1.165
rs2016337	11	78449282	A	G	0.4801	0.4862	0.7868	0.9758	0.8176	1.165
rs2053480	8	98348127	A	T	0.07248	0.0689	0.792	1.056	0.748	1.491
rs4968661	17	59150038	A	G	0.3955	0.4012	0.8166	0.9766	0.8142	1.171
rs2241031	3	37065278	T	C	0.4595	0.4538	0.8182	1.023	0.8545	1.225
rs636734	2	72464040	T	C	0.09958	0.09646	0.8205	1.036	0.7697	1.394
rs12494994	3	101305226	T	C	0.1981	0.1939	0.8205	1.027	0.8222	1.283
rs10508364	10	8808518	G	A	0.1943	0.1988	0.8206	0.972	0.7781	1.214
rs7039076	9	70305811	C	T	0.4822	0.4882	0.8216	0.9762	0.818	1.165
rs7965805	12	96451194	G	A	0.1017	0.1053	0.8245	0.9615	0.7194	1.285
rs2150720	9	2459742	T	C	0.283	0.2874	0.8418	0.9787	0.8048	1.19
rs1886308	20	52183110	C	A	0.1459	0.1421	0.8435	1.031	0.7965	1.334
rs1805794	8	91059655	G	C	0.3082	0.313	0.8455	0.9778	0.8078	1.184
rs1805799	8	91065147	C	T	0.3082	0.313	0.8455	0.9778	0.8078	1.184
rs17517341	12	57208972	A	C	0.3239	0.3189	0.8469	1.023	0.8468	1.236
rs3820060	1	167751176	G	T	0.3256	0.3304	0.8476	0.9787	0.8106	1.182
rs11846404	14	103225861	G	C	0.3543	0.3494	0.8502	1.022	0.8491	1.229
rs6931675	6	149426861	C	T	0.3634	0.3593	0.8512	1.018	0.8472	1.224
rs11652270	17	52789872	A	G	0.1557	0.1591	0.8524	0.9749	0.7642	1.244
rs6006179	22	28236701	A	G	0.4874	0.4921	0.8569	0.9813	0.8224	1.171
rs7845914	8	122514868	A	G	0.1894	0.1928	0.8627	0.9777	0.7798	1.226
rs13157304	5	66547908	C	G	0.1971	0.1931	0.8643	1.026	0.8205	1.282
rs177863	14	37189601	T	G	0.3267	0.3307	0.8855	0.9819	0.8134	1.185
rs4693941	4	89375923	A	T	0.4364	0.4397	0.8913	0.9868	0.8252	1.18
rs6099360	20	54945309	C	T	0.4391	0.4429	0.8916	0.9846	0.824	1.176
rs900347	1	144438084	T	C	0.4443	0.4478	0.8918	0.9859	0.8253	1.178
rs9882445	3	61588747	C	T	0.461	0.4643	0.8918	0.9868	0.826	1.179
rs16844299	1	233175982	G	A	0.1936	0.1964	0.9087	0.9825	0.7846	1.23
rs11624333	14	68049588	G	A	0.2642	0.2667	0.9187	0.9868	0.8079	1.205
rs644770	1	88519854	C	G	0.3093	0.3123	0.9221	0.9864	0.8144	1.195
rs16856054	3	172457243	G	A	0.06092	0.05906	0.9244	1.034	0.7124	1.5
rs922510	15	31148934	T	C	0.3721	0.375	0.9258	0.9878	0.8228	1.186
rs398588	5	55689928	G	C	0.3878	0.3848	0.9262	1.013	0.8447	1.214
rs1007690	11	125779213	C	T	0.4136	0.4163	0.9266	0.989	0.8255	1.185
rs17396773	2	33126715	A	C	0.06303	0.0641	0.9267	0.9821	0.6834	1.411
rs2823145	21	15504963	T	G	0.4946	0.492	0.9273	1.01	0.8449	1.208
rs1860529	2	42416790	G	A	0.4518	0.4547	0.9278	0.9882	0.8275	1.18
rs868107	7	47481782	G	T	0.07053	0.07185	0.9303	0.9802	0.6948	1.383
rs3863097	3	170309716	G	A	0.1108	0.1093	0.9425	1.016	0.7653	1.347
rs10952322	7	151178940	A	G	0.1579	0.1594	0.9508	0.9884	0.7759	1.259
rs12670165	7	29106738	T	C	0.1834	0.1821	0.9535	1.009	0.8029	1.268
rs11625422	14	94595367	T	C	0.2212	0.2195	0.9566	1.01	0.816	1.25
rs2834612	21	35028755	C	T	0.2495	0.251	0.9585	0.992	0.8089	1.216
rs17344479	5	142955142	A	G	0.2662	0.2682	0.9594	0.9899	0.8106	1.209
rs4954059	2	133979095	A	G	0.3947	0.3962	0.9631	0.9935	0.8285	1.191
rs7762928	6	149441301	C	G	0.3855	0.3866	0.9631	0.9954	0.8301	1.194
rs7070647	10	30141225	A	C	0.1751	0.1752	1	0.999	0.7918	1.26
rs10768122	11	35237428	C	T	0.3847	0.3848	1	0.9994	0.8334	1.198
rs7112354	11	19973194	A	G	0.1208	0.1211	1	0.9975	0.7606	1.308
rs3814731	11	70870250	A	G	0.04691	0.04609	1	1.019	0.6671	1.555
rs9536486	13	32600869	A	T	0.2206	0.2215	1	0.995	0.804	1.231
rs16954254	15	68276854	C	A	0.3302	0.3297	1	1.002	0.8304	1.209
rs2823144	21	15504804	C	G	0.3868	0.3878	1	0.9958	0.8306	1.194
rs2239815	22	27522670	C	T	0.312	0.313	1	0.9953	0.8224	1.204
rs7614199	3	189483533	A	T	0.3582	0.359	1	0.9966	0.8288	1.198
rs371394	5	33595785	C	G	0.1719	0.1722	1	0.9976	0.7894	1.261
rs1436228	6	83333906	C	T	0.3574	0.3573	1	1.001	0.8322	1.203
rs12685393	9	108128840	G	C	0.239	0.2392	1	0.999	0.8121	1.229
1chromosome
2base pair
3minor allele frequency in cases
4minor allele frequency in controls
5estimated odds ratio for the minor allele
6lower bound of 95% confidence interval for odds ratio
7upper bound of 95% confidence interval for odds ratio
