# Supplementary material for: Significant Association of Estrogen Receptor Binding Site Variation with Bipolar Disorder in Females
Source: PLoS One. 2012 Feb 28;7(2):e32304. doi: 10.1371/journal.pone.0032304 (PMC3289647; doi:10.1371/journal.pone.0032304)
Supplement: Table S3 — Association results for the female major depression material. (XLS) [file pone.0032304.s003.xls]

## Sheet: MD female
Table S3: Association results for the female major depression material.
rs-number	chr1	position (bp)2	minor allele	major allele	MAF (cases)3	MAF (controls)4	p-value	OR5	L956	U957
rs7217437	17	62894224	C	T	0.4783	0.4345	0.00318	1.193	1.062	1.342
rs975771	8	116968079	T	A	0.04633	0.0657	0.005161	0.6908	0.5348	0.8921
rs2964942	7	47473614	G	C	0.2913	0.3291	0.006128	0.8378	0.7384	0.9507
rs289783	5	55681709	C	G	0.02892	0.01772	0.01415	1.65	1.106	2.463
rs17564380	17	59731544	A	G	0.1138	0.09201	0.01689	1.268	1.045	1.538
rs2392757	2	221368651	A	G	0.2063	0.2358	0.01791	0.8422	0.7318	0.9692
rs709487	3	109183738	T	A	0.4412	0.4763	0.01856	0.8684	0.7726	0.976
rs6435822	2	214951740	A	T	0.1687	0.1431	0.02062	1.215	1.032	1.43
rs6667234	1	96298105	A	G	0.04511	0.05907	0.03743	0.7526	0.5783	0.9794
rs3768605	1	181445252	C	T	0.1816	0.1589	0.04423	1.174	1.005	1.371
rs10112645	8	8162906	A	G	0.4002	0.371	0.04583	1.131	1.003	1.276
rs2016337	11	78449282	T	C	0.485	0.4553	0.04614	1.126	1.002	1.266
rs177859	14	37186711	A	G	0.3475	0.3198	0.04977	1.133	1	1.283
rs17028882	3	32128395	A	T	0.113	0.09526	0.05239	1.21	0.9991	1.466
rs4726177	7	151903215	T	C	0.226	0.2505	0.05505	0.8739	0.7623	1.002
rs10979246	9	109940893	G	C	0.2149	0.1917	0.05507	1.154	0.9985	1.335
rs2823141	21	15501676	A	G	0.3971	0.4255	0.05582	0.8892	0.7895	1.002
rs932625	20	54744047	A	G	0.3097	0.3364	0.05606	0.8847	0.7809	1.002
rs17766381	3	61969241	G	T	0.1246	0.1432	0.0662	0.8515	0.7174	1.011
rs7025924	9	109966312	C	A	0.2167	0.1949	0.07226	1.143	0.9892	1.32
rs951424	2	180191138	A	G	0.2381	0.2616	0.07449	0.8821	0.7692	1.012
rs11738809	5	135005732	A	G	0.4895	0.4632	0.07908	1.111	0.989	1.249
rs351292	5	154428456	C	A	0.2935	0.2699	0.07955	1.124	0.9867	1.28
rs867286	2	45835534	A	G	0.3172	0.2927	0.0798	1.122	0.9881	1.275
rs4407439	3	170325243	G	C	0.1131	0.09683	0.08148	1.189	0.9828	1.44
rs12522219	5	154428839	C	G	0.1613	0.1429	0.09587	1.153	0.9789	1.359
rs2804889	10	33681870	A	G	0.1027	0.1181	0.09685	0.8541	0.7092	1.029
rs351293	5	154428597	T	C	0.4461	0.4221	0.1054	1.102	0.9801	1.24
rs6806797	3	189479315	C	T	0.3409	0.3189	0.1216	1.104	0.9756	1.25
rs2542419	8	129222462	T	G	0.1283	0.113	0.127	1.155	0.9626	1.386
rs1344476	16	8680697	C	T	0.3562	0.3778	0.1461	0.9111	0.805	1.031
rs7999417	13	22451518	A	G	0.4128	0.3913	0.1462	1.094	0.9714	1.232
rs1182389	7	156731564	A	G	0.329	0.3495	0.1466	0.9124	0.8062	1.033
rs6914891	6	15167278	T	C	0.4679	0.4466	0.1527	1.09	0.9696	1.225
rs10896380	11	68438978	G	A	0.2483	0.267	0.1534	0.9069	0.7939	1.036
rs17568464	14	71339043	G	A	0.4294	0.4081	0.1545	1.092	0.9692	1.229
rs11196811	10	116374052	A	C	0.07047	0.05998	0.1661	1.188	0.9367	1.507
rs84657	1	21477627	C	T	0.09875	0.08643	0.1674	1.158	0.9468	1.417
rs4726178	7	151903280	T	C	0.1567	0.1417	0.1696	1.125	0.9551	1.325
rs7129626	11	86094580	C	T	0.07174	0.08301	0.1741	0.8537	0.6839	1.066
rs17150098	5	122518993	T	C	0.03785	0.04584	0.1803	0.8188	0.6113	1.097
rs2823136	21	15493822	C	G	0.3139	0.3326	0.1821	0.918	0.8106	1.04
rs7069489	10	104515361	C	T	0.3344	0.3154	0.1823	1.091	0.9629	1.235
rs2072468	7	156210768	C	T	0.3816	0.4003	0.2006	0.9245	0.8204	1.042
rs701880	10	95209389	G	A	0.3266	0.309	0.2125	1.085	0.9569	1.23
rs567688	11	30425959	A	G	0.07167	0.06233	0.2137	1.161	0.9194	1.467
rs12949659	17	57248279	T	C	0.2613	0.2451	0.2185	1.089	0.9526	1.246
rs17695485	4	55397555	A	G	0.4295	0.4473	0.2302	0.9302	0.827	1.046
rs11624164	14	68055910	T	C	0.2637	0.2797	0.2351	0.9221	0.8074	1.053
rs13014394	2	216555810	T	C	0.2513	0.236	0.2394	1.086	0.9483	1.244
rs13120819	4	89379701	A	G	0.4458	0.4633	0.2441	0.9322	0.8292	1.048
rs4894459	3	172463563	A	T	0.4742	0.4916	0.2467	0.9324	0.8299	1.048
rs16930653	10	30142290	T	A	0.1641	0.1512	0.2469	1.102	0.937	1.297
rs16957696	16	66597351	T	C	0.1497	0.1375	0.2531	1.105	0.9354	1.305
rs10008749	4	40060307	C	G	0.3753	0.3586	0.2544	1.075	0.9523	1.213
rs10981210	9	113820111	C	T	0.1145	0.1254	0.2709	0.9024	0.754	1.08
rs4749641	10	8211363	A	C	0.1027	0.09273	0.2716	1.119	0.9196	1.363
rs4675052	2	226700070	A	G	0.2809	0.2663	0.2717	1.076	0.9445	1.227
rs17773381	11	16937789	G	A	0.3933	0.3772	0.2722	1.07	0.9498	1.207
rs17344479	5	142955142	T	C	0.2494	0.2635	0.2758	0.9284	0.8124	1.061
rs827946	20	46220866	T	G	0.2485	0.2345	0.2798	1.08	0.9415	1.238
rs1805794	8	91059655	G	C	0.3148	0.2994	0.2811	1.075	0.9454	1.222
rs12492816	3	16434072	C	A	0.1196	0.1093	0.2816	1.107	0.921	1.331
rs7425431	2	214949143	C	T	0.3434	0.3278	0.2832	1.072	0.9473	1.214
rs827945	20	46220900	A	G	0.4875	0.4716	0.2847	1.066	0.9485	1.197
rs2797180	1	116158877	A	C	0.4146	0.3988	0.2864	1.068	0.9474	1.203
rs32489	5	55634181	G	A	0.3198	0.3051	0.2906	1.071	0.9445	1.214
rs11652270	17	52789872	A	G	0.1812	0.1688	0.2907	1.089	0.9342	1.27
rs11102292	1	111857710	T	C	0.1543	0.166	0.2918	0.9161	0.7816	1.074
rs12924537	16	76611666	C	G	0.3718	0.3565	0.2938	1.068	0.9464	1.206
rs12359419	10	9261064	T	C	0.2542	0.2679	0.2943	0.9313	0.8157	1.063
rs2073583	11	17383912	G	C	0.2798	0.2939	0.3018	0.9334	0.8192	1.064
rs6570923	6	149406334	G	A	0.36	0.3448	0.3023	1.069	0.9454	1.208
rs4688644	3	61595789	T	A	0.4393	0.4548	0.3091	0.9395	0.8355	1.056
rs11846404	14	103225861	G	C	0.3403	0.3257	0.3136	1.068	0.9436	1.208
rs13157304	5	66547908	C	G	0.2348	0.2223	0.3225	1.073	0.9342	1.233
rs4871387	8	124645495	A	T	0.1887	0.1772	0.3365	1.08	0.9284	1.256
rs12551010	9	113814412	A	G	0.0487	0.0553	0.3466	0.8746	0.6722	1.138
rs16844296	1	233174931	A	G	0.1914	0.2028	0.3504	0.9306	0.8039	1.077
rs1415338	1	175811308	G	A	0.4215	0.4079	0.365	1.058	0.9396	1.191
rs8128036	21	35022791	A	T	0.4166	0.4299	0.3662	0.9469	0.8414	1.066
rs1555439	20	52242703	T	G	0.2083	0.1975	0.376	1.069	0.9252	1.236
rs7075880	10	95184928	C	T	0.1701	0.1802	0.3897	0.9329	0.8005	1.087
rs17396773	2	33126715	T	G	0.08102	0.08815	0.3921	0.912	0.7395	1.125
rs12931084	16	73645940	G	A	0.07728	0.07056	0.3949	1.103	0.8824	1.379
rs12543549	8	128750181	A	G	0.2833	0.2721	0.407	1.057	0.9283	1.204
rs4979073	9	113814149	T	C	0.2882	0.277	0.4096	1.057	0.9286	1.203
rs2325814	2	238127464	A	G	0.1176	0.1256	0.4134	0.928	0.7766	1.109
rs648227	6	161300626	G	A	0.4353	0.4477	0.4144	0.9507	0.8445	1.07
rs10236615	7	101402325	G	C	0.1997	0.1904	0.4302	1.062	0.916	1.23
rs16998549	20	51962387	C	T	0.03264	0.0284	0.4379	1.154	0.8214	1.622
rs11907750	20	46890421	G	C	0.216	0.2063	0.4444	1.059	0.9183	1.222
rs17588404	15	94227043	C	T	0.4337	0.4226	0.4531	1.046	0.93	1.177
rs2241957	16	54958795	T	C	0.4358	0.4246	0.4533	1.047	0.9306	1.177
rs2762929	20	52199602	C	T	0.3774	0.3665	0.4602	1.048	0.9288	1.182
rs7801518	7	140365429	A	G	0.2414	0.2318	0.4623	1.055	0.9192	1.21
rs16880195	6	18196584	G	A	0.09114	0.08481	0.4632	1.082	0.8806	1.33
rs16848941	2	164384159	C	T	0.1372	0.1449	0.4669	0.9385	0.7936	1.11
rs715706	4	106735477	T	C	0.2302	0.2209	0.4775	1.054	0.9173	1.212
rs11015919	10	27956585	G	A	0.08173	0.08783	0.488	0.9245	0.7502	1.139
rs1892883	11	100728599	A	T	0.191	0.1825	0.491	1.057	0.9095	1.228
rs10987379	9	128444825	C	T	0.09286	0.08656	0.4923	1.08	0.8778	1.33
rs916981	5	136488800	G	A	0.09148	0.08543	0.4955	1.078	0.8773	1.325
rs4751933	10	116099648	T	C	0.3197	0.3293	0.5039	0.9574	0.8452	1.085
rs889310	5	56000924	C	T	0.452	0.4423	0.5111	1.04	0.9252	1.169
rs2762928	20	52199492	T	A	0.1441	0.1372	0.5157	1.059	0.8933	1.256
rs12030100	1	160525528	C	T	0.2317	0.2231	0.5182	1.05	0.9118	1.209
rs310304	8	23705592	A	G	0.399	0.4085	0.5251	0.9615	0.8539	1.083
rs6758198	2	42321138	A	C	0.4253	0.4349	0.5288	0.9614	0.8547	1.081
rs6099360	20	54945309	C	T	0.457	0.4475	0.531	1.039	0.9245	1.168
rs10066724	5	66568154	G	T	0.09272	0.09819	0.5402	0.9386	0.7684	1.146
rs6097797	20	52196738	C	T	0.1374	0.1308	0.5415	1.058	0.8915	1.255
rs12069336	1	160395958	G	A	0.1652	0.1583	0.5422	1.052	0.8971	1.234
rs11699805	20	46141073	C	T	0.4479	0.4385	0.5459	1.039	0.9227	1.169
rs11073390	15	93136860	T	C	0.4312	0.4404	0.5477	0.963	0.8559	1.083
rs2254267	3	114747684	C	T	0.097	0.1025	0.5479	0.941	0.7732	1.145
rs2486409	6	149443159	A	G	0.28	0.2882	0.5525	0.9601	0.8437	1.093
rs16942741	15	87482020	C	T	0.2051	0.1978	0.5531	1.046	0.9045	1.21
rs17681747	5	132613427	T	C	0.2181	0.2109	0.5623	1.044	0.9055	1.203
rs7111951	11	19973135	A	G	0.1134	0.1077	0.5699	1.06	0.8798	1.276
rs12726307	1	175807633	T	G	0.1411	0.1349	0.5758	1.053	0.8896	1.247
rs10491732	9	4496655	A	G	0.3566	0.3485	0.5758	1.036	0.9172	1.17
rs763073	22	27545542	A	G	0.302	0.2942	0.5796	1.038	0.9136	1.18
rs1980781	13	32598374	G	T	0.2124	0.2058	0.584	1.041	0.9022	1.201
rs749020	21	42379554	A	G	0.3921	0.4005	0.584	0.9658	0.8572	1.088
rs2637496	5	124771166	T	C	0.08417	0.07946	0.5885	1.065	0.8608	1.317
rs2138278	10	127732654	A	G	0.4217	0.4297	0.5888	0.9677	0.8602	1.089
rs4811023	20	48342100	T	G	0.3257	0.3178	0.5891	1.037	0.9152	1.174
rs6022985	20	52199020	G	C	0.2906	0.2833	0.598	1.036	0.9106	1.179
rs4916853	5	90624074	G	A	0.05766	0.05379	0.6037	1.076	0.834	1.389
rs456578	20	46220350	A	G	0.3923	0.3845	0.6044	1.033	0.9169	1.164
rs16910692	12	15261277	C	T	0.3241	0.3169	0.6103	1.034	0.9124	1.171
rs6440991	3	101241155	T	C	0.1729	0.1791	0.6117	0.9583	0.8224	1.117
rs4505703	3	118455969	T	C	0.5013	0.4935	0.6136	1.032	0.9182	1.159
rs272893	5	131690961	T	C	0.3722	0.3793	0.622	0.9698	0.8594	1.094
rs2597510	3	13498338	G	C	0.4389	0.4313	0.6304	1.031	0.9165	1.16
rs4815295	20	24578360	T	C	0.3249	0.3318	0.6351	0.9691	0.8561	1.097
rs17115945	14	21810725	A	G	0.2162	0.2105	0.638	1.035	0.8978	1.193
rs7021194	9	2459764	G	C	0.153	0.1583	0.6514	0.9606	0.8178	1.128
rs8014434	14	95602064	C	T	0.2441	0.2502	0.6542	0.9678	0.8456	1.108
rs4362470	18	41627762	G	A	0.3567	0.363	0.6648	0.9729	0.8617	1.098
rs7901847	10	8204221	T	C	0.3888	0.3824	0.6693	1.027	0.9114	1.158
rs7191676	16	83055721	C	T	0.04743	0.05019	0.6737	0.9423	0.7154	1.241
rs8130564	21	42678725	C	T	0.4281	0.4346	0.6741	0.9739	0.8657	1.096
rs4566139	15	87483539	T	C	0.3745	0.3804	0.6904	0.9753	0.8649	1.1
rs10747655	12	51651722	G	A	0.4528	0.4466	0.6914	1.025	0.9097	1.156
rs6444774	3	195369888	A	G	0.07256	0.07581	0.6917	0.9537	0.7638	1.191
rs2150720	9	2459742	A	G	0.2925	0.2868	0.6945	1.028	0.9043	1.169
rs10438771	17	57083021	G	A	0.2511	0.2562	0.7024	0.9732	0.8493	1.115
rs11238898	10	43999022	A	T	0.09197	0.09542	0.7207	0.9603	0.7861	1.173
rs6435979	2	217939894	C	T	0.2348	0.2395	0.7268	0.9742	0.8495	1.117
rs517832	1	88532429	T	C	0.3463	0.3515	0.7318	0.9772	0.8648	1.104
rs4623734	1	109584728	T	G	0.2675	0.2629	0.7355	1.024	0.8967	1.169
rs3794102	11	35250762	G	A	0.425	0.4299	0.7403	0.98	0.8708	1.103
rs4760135	12	57237496	T	C	0.3059	0.3013	0.7466	1.022	0.9004	1.16
rs10804226	2	214951988	T	C	0.3357	0.3403	0.7534	0.9796	0.8661	1.108
rs17157514	7	29108717	C	G	0.1823	0.1858	0.7589	0.9767	0.8403	1.135
rs11806311	1	202616691	A	G	0.03934	0.04115	0.7612	0.9541	0.708	1.286
rs2635162	8	98352805	A	G	0.0672	0.06465	0.7649	1.042	0.8241	1.318
rs3774339	3	37037858	T	C	0.459	0.4542	0.7652	1.019	0.9068	1.146
rs2168818	3	55828309	A	T	0.1479	0.151	0.7709	0.9759	0.829	1.149
rs10927733	1	15415855	G	C	0.1535	0.1569	0.7739	0.9742	0.8295	1.144
rs9315232	13	33102061	T	C	0.02654	0.02484	0.7777	1.07	0.7393	1.55
rs2727288	17	59254929	T	A	0.3563	0.3521	0.7778	1.019	0.9007	1.152
rs11168359	12	46702290	A	G	0.1389	0.1418	0.794	0.9758	0.8228	1.157
rs10228159	7	88496284	G	A	0.2008	0.2043	0.7953	0.9787	0.8464	1.132
rs4980206	10	125471853	C	T	0.306	0.31	0.7966	0.9815	0.8651	1.114
rs7032202	9	110281281	C	G	0.3217	0.3179	0.7988	1.017	0.8979	1.153
rs1049534	22	28238072	T	C	0.2268	0.2232	0.7995	1.021	0.8854	1.177
rs2834612	21	35028755	C	T	0.226	0.2225	0.8031	1.02	0.887	1.173
rs2619284	3	103365101	G	A	0.3774	0.3736	0.8037	1.016	0.8997	1.148
rs7308567	12	52506907	G	C	0.461	0.4574	0.8111	1.015	0.9024	1.141
rs9355112	6	169082073	T	C	0.1671	0.1699	0.8118	0.9799	0.8387	1.145
rs7105836	11	84077206	T	C	0.1119	0.1142	0.8146	0.9781	0.8138	1.176
rs1011454	5	102396154	C	T	0.3142	0.3111	0.8224	1.015	0.8947	1.151
rs12099330	11	19966135	T	C	0.1328	0.1352	0.8275	0.9796	0.8257	1.162
rs4118099	6	154656118	A	C	0.3744	0.3778	0.8301	0.9856	0.874	1.111
rs4719480	7	16801076	C	A	0.1475	0.1498	0.8346	0.9819	0.8336	1.156
rs3776861	5	102377561	C	A	0.3024	0.2996	0.844	1.013	0.891	1.152
rs17396153	8	102548378	T	A	0.1754	0.1777	0.8456	0.9847	0.8453	1.147
rs737976	22	28243272	C	T	0.4751	0.4779	0.8576	0.9887	0.8794	1.112
rs6022716	20	36122307	G	A	0.4623	0.4595	0.858	1.011	0.8996	1.137
rs6066654	20	46221065	T	C	0.2326	0.235	0.8604	0.9868	0.8597	1.133
rs11079336	17	53328720	A	C	0.2837	0.2862	0.867	0.988	0.8664	1.127
rs11667789	19	56287588	C	T	0.2873	0.2897	0.8673	0.9881	0.8667	1.126
rs6022616	20	36109249	C	T	0.1471	0.1488	0.8673	0.9862	0.8371	1.162
rs7042271	9	96794268	A	C	0.03286	0.03387	0.8682	0.9691	0.6997	1.342
rs3212528	5	52388971	A	G	0.07958	0.08132	0.8699	0.9768	0.7887	1.21
rs12305182	12	46707674	T	G	0.217	0.2188	0.8842	0.9895	0.8578	1.141
rs7965805	12	96451194	G	A	0.1089	0.1075	0.8858	1.015	0.8408	1.224
rs7850721	9	4856724	C	T	0.04603	0.0449	0.8865	1.026	0.7755	1.358
rs515126	8	102548010	A	T	0.3268	0.3287	0.8993	0.9915	0.8758	1.122
rs13162193	5	154429020	C	T	0.1632	0.1617	0.9039	1.011	0.8633	1.184
rs17654278	4	47388573	A	G	0.1173	0.1161	0.9263	1.011	0.8433	1.212
rs2067833	6	53438315	C	T	0.3895	0.3912	0.9272	0.993	0.8813	1.119
rs4673821	2	214952060	T	C	0.4679	0.4693	0.9289	0.9942	0.8847	1.117
rs2891902	8	122491311	T	C	0.175	0.1761	0.9378	0.9923	0.8516	1.156
rs1292145	5	56007626	A	G	0.2004	0.1993	0.9408	1.007	0.8704	1.164
rs1436228	6	83333906	C	T	0.3543	0.3533	0.9503	1.004	0.8888	1.135
rs17065421	3	61768658	A	C	0.09383	0.09433	0.9595	0.9941	0.8145	1.213
rs2193747	2	216867589	A	G	0.1093	0.1085	0.962	1.008	0.8362	1.215
rs12099044	11	86087455	G	A	0.1132	0.1124	0.9624	1.007	0.8375	1.212
rs16826906	3	158115133	G	C	0.1242	0.125	0.9642	0.9924	0.8321	1.184
rs12344537	9	96538605	G	A	0.1251	0.1257	0.9642	0.9946	0.8341	1.186
rs4861349	4	40060889	G	C	0.263	0.2624	0.973	1.003	0.8786	1.145
rs1956532	14	67853027	T	C	0.3724	0.3731	0.9755	0.9968	0.8836	1.125
rs11732739	4	40060742	A	C	0.4563	0.4556	0.9758	1.003	0.89	1.129
rs17141049	10	17494668	G	A	0.02559	0.02568	1	0.9964	0.6888	1.441
rs11621737	14	94592587	A	G	0.2354	0.2356	1	0.999	0.871	1.146
rs16945848	15	60913837	T	C	0.1079	0.1083	1	0.9963	0.8261	1.202
rs158554	20	52173270	G	A	0.09835	0.09864	1	0.9967	0.8163	1.217
rs1450522	3	162560324	G	A	0.3097	0.3101	1	0.9983	0.8801	1.132
rs10009152	4	2378195	C	T	0.1736	0.1732	1	1.003	0.8597	1.17
rs256639	5	33592123	A	G	0.2009	0.2009	1	0.9999	0.8634	1.158
rs398588	5	55689928	C	G	0.3766	0.3764	1	1.001	0.8871	1.129
rs1623654	5	66548575	A	T	0.4953	0.4952	1	1	0.8891	1.125
rs4741713	9	2460058	A	G	0.2093	0.2098	1	0.9974	0.8645	1.151
1chromosome
2base pair
3minor allele frequency in cases
4minor allele frequency in controls
5estimated odds ratio for the minor allele
6lower bound of 95% confidence interval for odds ratio
7upper bound of 95% confidence interval for odds ratio
