# Supplementary material for: Significant Association of Estrogen Receptor Binding Site Variation with Bipolar Disorder in Females
Source: PLoS One. 2012 Feb 28;7(2):e32304. doi: 10.1371/journal.pone.0032304 (PMC3289647; doi:10.1371/journal.pone.0032304)
Supplement: Table S4 — Association results for the male major depression material. (XLS) [file pone.0032304.s004.xls]

## Sheet: MD male
Table S4: Association results for the male major depression material.
rs-number	chr1	position (bp)2	minor allele	major allele	MAF (cases)3	MAF (controls)4	p-value	OR5	L956	U957
rs16848941	2	164384159	C	T	0.1613	0.1081	0.000155	1.587	1.251	2.012
rs10236615	7	101402325	G	C	0.2375	0.1755	0.0002195	1.464	1.199	1.787
rs2168818	3	55828309	A	T	0.1338	0.1789	0.002941	0.7089	0.5661	0.8878
rs16930653	10	30142290	T	A	0.1775	0.1337	0.003755	1.397	1.115	1.751
rs4118099	6	154656118	A	C	0.4061	0.3488	0.003955	1.277	1.082	1.507
rs2797180	1	116158877	A	C	0.3803	0.4338	0.00917	0.8011	0.6789	0.9452
rs4505703	3	118455969	T	C	0.4695	0.5213	0.0122	0.8126	0.6916	0.9548
rs12931084	16	73645940	G	A	0.08667	0.06038	0.01372	1.477	1.083	2.013
rs1344476	16	8680697	C	T	0.3382	0.3874	0.01515	0.8081	0.6811	0.9587
rs648227	6	161300626	G	A	0.4244	0.4738	0.01764	0.8189	0.6953	0.9645
rs11699805	20	46141073	C	T	0.4286	0.476	0.02224	0.8256	0.7012	0.9721
rs7105836	11	84077206	T	C	0.09583	0.1259	0.02301	0.7357	0.5671	0.9544
rs158554	20	52173270	G	A	0.08048	0.105	0.05214	0.7459	0.5589	0.9955
rs1956532	14	67853027	T	C	0.3298	0.3686	0.05307	0.8432	0.7119	0.9987
rs567688	11	30425959	A	G	0.0759	0.05588	0.05466	1.388	1.003	1.92
rs2016337	11	78449282	T	C	0.5219	0.4823	0.05869	1.172	0.9972	1.377
rs7129626	11	86094580	C	T	0.05819	0.07883	0.0599	0.7219	0.5191	1.004
rs10804226	2	214951988	T	C	0.3552	0.3189	0.06158	1.177	0.9926	1.395
rs1980781	13	32598374	G	T	0.1831	0.2129	0.07269	0.8286	0.6764	1.015
rs4980206	10	125471853	C	T	0.2916	0.325	0.08309	0.8549	0.7176	1.018
rs6022716	20	36122307	G	A	0.4744	0.4388	0.08343	1.154	0.9821	1.357
rs737976	22	28243272	C	T	0.5019	0.4667	0.09074	1.152	0.9796	1.354
rs4741713	9	2460058	A	G	0.1973	0.2251	0.1089	0.8465	0.6945	1.032
rs4979073	9	113814149	T	C	0.2956	0.2661	0.1097	1.157	0.9679	1.384
rs272893	5	131690961	T	C	0.3458	0.3768	0.1233	0.874	0.7386	1.034
rs6097797	20	52196738	C	T	0.1281	0.1507	0.1243	0.8278	0.6548	1.046
rs6667234	1	96298105	A	G	0.04087	0.05499	0.1275	0.7324	0.499	1.075
rs17396773	2	33126715	T	G	0.0717	0.08876	0.1326	0.793	0.5872	1.071
rs7111951	11	19973135	A	G	0.1233	0.1034	0.1348	1.22	0.9474	1.572
rs12543549	8	128750181	A	G	0.3	0.2725	0.145	1.144	0.9578	1.367
rs17654278	4	47388573	A	G	0.09791	0.1169	0.1467	0.8198	0.6308	1.065
rs11238898	10	43999022	A	T	0.1084	0.09044	0.1479	1.222	0.9344	1.599
rs867286	2	45835534	A	G	0.2904	0.318	0.1509	0.8777	0.7354	1.047
rs10112645	8	8162906	A	G	0.3992	0.3703	0.1599	1.13	0.9563	1.335
rs16957696	16	66597351	T	C	0.1416	0.1222	0.1618	1.185	0.9344	1.502
rs256639	5	33592123	A	G	0.2166	0.1926	0.1637	1.159	0.9479	1.418
rs2067833	6	53438315	C	T	0.4116	0.3837	0.1661	1.124	0.9534	1.325
rs12359419	10	9261064	T	C	0.2867	0.2606	0.1662	1.14	0.9518	1.365
rs4726177	7	151903215	T	C	0.2343	0.2588	0.1685	0.8763	0.7266	1.057
rs11652270	17	52789872	A	G	0.1842	0.163	0.1742	1.159	0.9374	1.433
rs12069336	1	160395958	G	A	0.1528	0.1738	0.181	0.8571	0.6876	1.068
rs4811023	20	48342100	T	G	0.3283	0.3028	0.1852	1.125	0.9467	1.338
rs17115945	14	21810725	A	G	0.2448	0.2214	0.1894	1.14	0.9427	1.378
rs6022985	20	52199020	G	C	0.2777	0.3029	0.1899	0.8845	0.7404	1.057
rs17150098	5	122518993	T	C	0.03155	0.04216	0.1941	0.7401	0.4783	1.145
rs12030100	1	160525528	C	T	0.2184	0.2417	0.2	0.8771	0.7222	1.065
rs10987379	9	128444825	C	T	0.08631	0.1024	0.2003	0.8278	0.6238	1.098
rs17564380	17	59731544	A	G	0.1072	0.1246	0.2021	0.8434	0.655	1.086
rs1415338	1	175811308	G	A	0.425	0.3991	0.2107	1.113	0.9452	1.311
rs310304	8	23705592	A	G	0.4344	0.4091	0.2127	1.109	0.9427	1.306
rs8014434	14	95602064	C	T	0.2457	0.2243	0.2254	1.126	0.9318	1.361
rs4815295	20	24578360	T	C	0.334	0.3583	0.2278	0.898	0.7582	1.064
rs4871387	8	124645495	A	T	0.1851	0.1664	0.2339	1.138	0.921	1.406
rs10009152	4	2378195	C	T	0.1901	0.1711	0.2389	1.137	0.9228	1.402
rs701880	10	95209389	G	A	0.3257	0.3494	0.2405	0.8994	0.7582	1.067
rs16844296	1	233174931	A	G	0.192	0.2115	0.2411	0.8862	0.7248	1.084
rs2727288	17	59254929	T	A	0.3706	0.3466	0.242	1.11	0.9369	1.315
rs932625	20	54744047	A	G	0.313	0.2906	0.2435	1.112	0.9333	1.326
rs11073390	15	93136860	T	C	0.4257	0.4499	0.2464	0.9063	0.7704	1.066
rs6444774	3	195369888	A	G	0.08349	0.07069	0.2468	1.198	0.8862	1.618
rs7042271	9	96794268	A	C	0.03757	0.02897	0.2478	1.308	0.833	2.055
rs16942741	15	87482020	C	T	0.2105	0.1912	0.2582	1.128	0.9228	1.379
rs11907750	20	46890421	G	C	0.1886	0.207	0.2801	0.89	0.7267	1.09
rs2762929	20	52199602	C	T	0.3582	0.3787	0.3061	0.9158	0.7745	1.083
rs7850721	9	4856724	C	T	0.03927	0.03102	0.3107	1.277	0.824	1.979
rs6806797	3	189479315	C	T	0.3137	0.3338	0.3134	0.9121	0.7678	1.084
rs17157514	7	29108717	C	G	0.2004	0.1838	0.3206	1.113	0.9071	1.365
rs11806311	1	202616691	A	G	0.03167	0.03943	0.3217	0.7967	0.5119	1.24
rs16880195	6	18196584	G	A	0.0865	0.07551	0.3274	1.159	0.8638	1.556
rs10927733	1	15415855	G	C	0.1471	0.162	0.3361	0.8917	0.7134	1.115
rs8130564	21	42678725	C	T	0.4159	0.4351	0.3601	0.9243	0.7851	1.088
rs1805794	8	91059655	G	C	0.2955	0.3129	0.3673	0.9212	0.7715	1.1
rs2637496	5	124771166	T	C	0.07495	0.08517	0.3674	0.8703	0.6461	1.172
rs9355112	6	169082073	T	C	0.1505	0.1647	0.3682	0.8983	0.7197	1.121
rs17344479	5	142955142	T	C	0.2643	0.2474	0.3702	1.093	0.9085	1.314
rs4719480	7	16801076	C	A	0.1537	0.1676	0.3726	0.9017	0.7239	1.123
rs2804889	10	33681870	A	G	0.1243	0.1122	0.3729	1.123	0.8762	1.44
rs2392757	2	221368651	A	G	0.2129	0.2287	0.3738	0.9125	0.7513	1.108
rs10438771	17	57083021	G	A	0.2411	0.2576	0.3848	0.9155	0.7572	1.107
rs2542419	8	129222462	T	G	0.1191	0.1071	0.3912	1.127	0.8713	1.458
rs12551010	9	113814412	A	G	0.05418	0.04646	0.3968	1.176	0.814	1.698
rs3794102	11	35250762	G	A	0.4175	0.3997	0.4018	1.076	0.9133	1.268
rs4623734	1	109584728	T	G	0.2615	0.2774	0.4044	0.9223	0.7688	1.107
rs6435822	2	214951740	A	T	0.1519	0.1397	0.4107	1.103	0.8765	1.388
rs10981210	9	113820111	C	T	0.1269	0.1154	0.4118	1.114	0.8705	1.425
rs1450522	3	162560324	G	A	0.2833	0.2988	0.4167	0.9274	0.7767	1.107
rs4566139	15	87483539	T	C	0.3529	0.3695	0.4177	0.9307	0.7872	1.1
rs17773381	11	16937789	G	A	0.3641	0.3805	0.4204	0.9321	0.7891	1.101
rs951424	2	180191138	A	G	0.2401	0.2258	0.4274	1.083	0.8923	1.316
rs11079336	17	53328720	A	C	0.268	0.2836	0.4296	0.9252	0.7708	1.111
rs17588404	15	94227043	C	T	0.4354	0.4194	0.4309	1.068	0.9074	1.256
rs7308567	12	52506907	G	C	0.4505	0.4667	0.4331	0.9369	0.7968	1.102
rs12522219	5	154428839	C	G	0.1731	0.1605	0.4366	1.095	0.8815	1.361
rs1292145	5	56007626	A	G	0.2038	0.1904	0.4379	1.088	0.889	1.332
rs12924537	16	76611666	C	G	0.3558	0.3404	0.4381	1.07	0.9038	1.267
rs3776861	5	102377561	C	A	0.3245	0.3097	0.446	1.071	0.8982	1.276
rs11624164	14	68055910	T	C	0.2657	0.28	0.4555	0.9302	0.7744	1.117
rs4673821	2	214952060	T	C	0.4667	0.4824	0.4596	0.9392	0.7994	1.103
rs17028882	3	32128395	A	T	0.09905	0.1085	0.461	0.9033	0.6931	1.177
rs7021194	9	2459764	G	C	0.1508	0.162	0.4631	0.9183	0.7352	1.147
rs16910692	12	15261277	C	T	0.3282	0.3142	0.48	1.067	0.8973	1.268
rs2073583	11	17383912	G	C	0.2742	0.2873	0.4901	0.9372	0.7822	1.123
rs4916853	5	90624074	G	A	0.05662	0.0637	0.4905	0.8822	0.6269	1.241
rs7801518	7	140365429	A	G	0.2395	0.2273	0.4947	1.07	0.8841	1.295
rs763073	22	27545542	A	G	0.2872	0.3	0.4985	0.9402	0.7874	1.123
rs2325814	2	238127464	A	G	0.1385	0.129	0.5071	1.085	0.8574	1.374
rs12344537	9	96538605	G	A	0.1291	0.139	0.5077	0.9181	0.7242	1.164
rs7025924	9	109966312	C	A	0.2154	0.2265	0.5214	0.9372	0.7719	1.138
rs6570923	6	149406334	G	A	0.3607	0.3743	0.5222	0.9433	0.7979	1.115
rs2193747	2	216867589	A	G	0.1224	0.1136	0.5245	1.088	0.8482	1.395
rs12099044	11	86087455	G	A	0.1023	0.09467	0.534	1.09	0.8314	1.428
rs889310	5	56000924	C	T	0.4573	0.444	0.536	1.055	0.8976	1.24
rs827945	20	46220900	G	A	0.481	0.4941	0.5382	0.9489	0.8079	1.115
rs17681747	5	132613427	T	C	0.2196	0.2088	0.5478	1.066	0.8763	1.297
rs4675052	2	226700070	A	G	0.2837	0.272	0.5515	1.06	0.886	1.268
rs749020	21	42379554	A	G	0.4067	0.3944	0.5558	1.053	0.8927	1.241
rs4749641	10	8211363	A	C	0.09506	0.08811	0.5688	1.087	0.8229	1.436
rs4861349	4	40060889	G	C	0.2624	0.2731	0.5781	0.9468	0.7892	1.136
rs2619284	3	103365101	G	A	0.3866	0.398	0.5789	0.9531	0.8061	1.127
rs11102292	1	111857710	T	C	0.1759	0.1672	0.5857	1.063	0.8589	1.316
rs10066724	5	66568154	G	T	0.09866	0.1062	0.5873	0.9208	0.7049	1.203
rs6022616	20	36109249	C	T	0.1471	0.1393	0.5981	1.065	0.8471	1.34
rs1011454	5	102396154	C	T	0.3359	0.3257	0.6009	1.047	0.8824	1.242
rs12949659	17	57248279	T	C	0.2495	0.2588	0.6047	0.952	0.7912	1.145
rs1182389	7	156731564	A	G	0.355	0.3653	0.6065	0.9563	0.8079	1.132
rs11015919	10	27956585	G	A	0.08159	0.08798	0.6075	0.921	0.6896	1.23
rs456578	20	46220350	A	G	0.3802	0.3906	0.6131	0.9571	0.8113	1.129
rs2150720	9	2459742	A	G	0.2818	0.2718	0.6134	1.051	0.8782	1.258
rs7548516	1	149246905	C	T	0.218	0.2093	0.6158	1.053	0.8654	1.282
rs13014394	2	216555810	T	C	0.2078	0.2166	0.6164	0.9486	0.7791	1.155
rs8128036	21	35022791	A	T	0.423	0.4338	0.6187	0.9568	0.8131	1.126
rs715706	4	106735477	T	C	0.2276	0.2185	0.6216	1.054	0.869	1.279
rs6066654	20	46221065	T	C	0.2452	0.2363	0.6299	1.05	0.8692	1.268
rs3768605	1	181445252	C	T	0.1835	0.1755	0.63	1.056	0.8562	1.302
rs398588	5	55689928	C	G	0.3805	0.3704	0.6402	1.044	0.8839	1.233
rs2823141	21	15501676	A	G	0.4058	0.4154	0.6447	0.9609	0.8151	1.133
rs2241957	16	54958795	T	C	0.4248	0.4347	0.6483	0.9604	0.8163	1.13
rs12492816	3	16434072	C	A	0.1113	0.1181	0.6506	0.9356	0.7253	1.207
rs10228159	7	88496284	G	A	0.2195	0.2115	0.6523	1.048	0.8614	1.275
rs7965805	12	96451194	G	A	0.1219	0.116	0.6567	1.058	0.8254	1.357
rs517832	1	88532429	T	C	0.3527	0.3439	0.6664	1.039	0.8779	1.231
rs2072468	7	156210768	C	T	0.3983	0.4072	0.6756	0.9636	0.8177	1.135
rs11667789	19	56287588	C	T	0.2895	0.2982	0.6799	0.9592	0.8012	1.148
rs84657	1	21477627	C	T	0.09619	0.1021	0.6807	0.9364	0.7149	1.227
rs16945848	15	60913837	T	C	0.09962	0.1056	0.6857	0.9374	0.7189	1.222
rs2834612	21	35028755	C	T	0.2295	0.2228	0.6946	1.039	0.8574	1.26
rs17766381	3	61969241	G	T	0.1274	0.1221	0.7092	1.05	0.8232	1.339
rs2762928	20	52199492	T	A	0.1267	0.1327	0.7103	0.9481	0.7433	1.209
rs6440991	3	101241155	T	C	0.1863	0.1804	0.7104	1.04	0.8449	1.281
rs6758198	2	42321138	A	C	0.4611	0.4691	0.7113	0.9683	0.8241	1.138
rs12305182	12	46707674	T	G	0.22	0.2137	0.7233	1.038	0.8512	1.265
rs11846404	14	103225861	G	C	0.3159	0.3231	0.7251	0.9678	0.8145	1.15
rs2823136	21	15493822	C	G	0.3327	0.326	0.727	1.031	0.8687	1.223
rs17568464	14	71339043	G	A	0.418	0.4103	0.7368	1.032	0.8753	1.217
rs351293	5	154428597	T	C	0.4524	0.4455	0.7412	1.028	0.8745	1.209
rs6099360	20	54945309	C	T	0.4592	0.4523	0.7419	1.028	0.875	1.208
rs2891902	8	122491311	T	C	0.1736	0.1789	0.7472	0.9644	0.7809	1.191
rs351292	5	154428456	C	A	0.2994	0.2934	0.7524	1.029	0.8627	1.228
rs12099330	11	19966135	T	C	0.1229	0.1279	0.7568	0.9547	0.7484	1.218
rs1892883	11	100728599	A	T	0.204	0.1988	0.7582	1.033	0.8448	1.263
rs7425431	2	214949143	C	T	0.3337	0.327	0.7594	1.031	0.8684	1.223
rs10979246	9	109940893	G	C	0.2185	0.2239	0.7667	0.969	0.798	1.177
rs11621737	14	94592587	A	G	0.2291	0.2236	0.7686	1.032	0.8515	1.25
rs12726307	1	175807633	T	G	0.1424	0.1473	0.7704	0.9618	0.7647	1.21
rs7217437	17	62894224	C	T	0.4412	0.4472	0.7728	0.9758	0.8301	1.147
rs7069489	10	104515361	C	T	0.3013	0.3072	0.7888	0.9725	0.8162	1.159
rs16998549	20	51962387	C	T	0.02677	0.02507	0.7967	1.069	0.6443	1.775
rs10747655	12	51651722	G	A	0.4618	0.468	0.8008	0.9757	0.8274	1.151
rs11196811	10	116374052	A	C	0.06238	0.06573	0.8011	0.9456	0.6795	1.316
rs16826906	3	158115133	G	C	0.1224	0.1188	0.8011	1.035	0.8086	1.324
rs11732739	4	40060742	A	C	0.451	0.4566	0.8015	0.9775	0.8294	1.152
rs1623654	5	66548575	A	T	0.4672	0.4731	0.8036	0.9765	0.8301	1.149
rs4688644	3	61595789	T	A	0.4399	0.4455	0.8039	0.9775	0.8311	1.15
rs3774339	3	37037858	T	C	0.4487	0.4435	0.8045	1.021	0.8684	1.2
rs9315232	13	33102061	T	C	0.02788	0.03024	0.807	0.92	0.5678	1.491
rs11168359	12	46702290	A	G	0.1339	0.1378	0.8081	0.967	0.7617	1.228
rs10896380	11	68438978	G	A	0.2486	0.2438	0.8118	1.026	0.8516	1.237
rs2486409	6	149443159	A	G	0.2845	0.2802	0.8192	1.021	0.8536	1.222
rs1436228	6	83333906	C	T	0.3448	0.3496	0.8289	0.9793	0.8266	1.16
rs7999417	13	22451518	A	G	0.389	0.3937	0.8337	0.9805	0.8316	1.156
rs7901847	10	8204221	T	C	0.4156	0.4108	0.8348	1.02	0.8662	1.201
rs13120819	4	89379701	A	G	0.4619	0.4574	0.8368	1.018	0.8666	1.197
rs4894459	3	172463563	A	T	0.4867	0.4817	0.8374	1.02	0.8686	1.198
rs2254267	3	114747684	C	T	0.1022	0.105	0.8378	0.97	0.7417	1.269
rs17695485	4	55397555	A	G	0.4128	0.4164	0.8673	0.9853	0.8364	1.161
rs2597510	3	13498338	G	C	0.4272	0.4313	0.8678	0.9834	0.8354	1.158
rs2138278	10	127732654	A	G	0.4231	0.4273	0.8682	0.9831	0.8355	1.157
rs3212528	5	52388971	A	G	0.07875	0.07698	0.8785	1.025	0.7594	1.383
rs1049534	22	28238072	T	C	0.2334	0.2361	0.8833	0.9849	0.8127	1.194
rs916981	5	136488800	G	A	0.08604	0.08802	0.8841	0.9754	0.7324	1.299
rs13157304	5	66547908	C	G	0.2376	0.2405	0.8854	0.9846	0.8153	1.189
rs17065421	3	61768658	A	C	0.08935	0.09191	0.8864	0.9694	0.7323	1.283
rs4760135	12	57237496	T	C	0.296	0.293	0.8926	1.015	0.8508	1.211
rs32489	5	55634181	G	A	0.3101	0.3069	0.8938	1.015	0.8528	1.209
rs17141049	10	17494668	G	A	0.02852	0.03024	0.9034	0.9415	0.5838	1.518
rs7075880	10	95184928	C	T	0.1746	0.1725	0.9138	1.014	0.8203	1.254
rs975771	8	116968079	T	A	0.05133	0.05279	0.9266	0.9709	0.6758	1.395
rs4751933	10	116099648	T	C	0.3073	0.3093	0.929	0.9902	0.8314	1.179
rs6914891	6	15167278	T	C	0.4393	0.437	0.9341	1.01	0.8585	1.187
rs709487	3	109183738	T	A	0.4592	0.4575	0.9345	1.007	0.857	1.183
rs10491732	9	4496655	A	G	0.3567	0.3583	0.9659	0.9932	0.8398	1.175
rs4362470	18	41627762	G	A	0.3679	0.3664	0.966	1.006	0.8518	1.189
rs177859	14	37186711	A	G	0.3526	0.3524	1	1.001	0.845	1.186
rs7191676	16	83055721	C	T	0.04035	0.04054	1	0.9952	0.6575	1.506
rs827946	20	46220866	T	G	0.2641	0.2641	1	1	0.8317	1.202
rs1555439	20	52242703	T	G	0.1992	0.1987	1	1.004	0.8205	1.227
rs6435979	2	217939894	C	T	0.2609	0.2603	1	1.003	0.8355	1.205
rs4407439	3	170325243	G	C	0.1008	0.1013	1	0.9938	0.761	1.298
rs10008749	4	40060307	C	G	0.3729	0.3724	1	1.002	0.8484	1.183
rs289783	5	55681709	C	G	0.0153	0.01553	1	0.9846	0.5112	1.896
rs11738809	5	135005732	A	G	0.4971	0.4978	1	0.9974	0.8491	1.172
rs13162193	5	154429020	C	T	0.1641	0.1642	1	0.9994	0.8044	1.242
rs2964942	7	47473614	G	C	0.3021	0.3024	1	0.9987	0.8376	1.191
rs4726178	7	151903280	T	C	0.1414	0.1417	1	0.9972	0.7918	1.256
rs2635162	8	98352805	A	G	0.06844	0.06818	1	1.004	0.73	1.381
rs515126	8	102548010	A	T	0.3188	0.3191	1	0.9985	0.8402	1.187
rs17396153	8	102548378	T	A	0.1651	0.1652	1	0.9992	0.8046	1.241
rs7032202	9	110281281	C	G	0.3162	0.3164	1	0.9988	0.8401	1.188
1chromosome
2base pair
3minor allele frequency in cases
4minor allele frequency in controls
5estimated odds ratio for the minor allele
6lower bound of 95% confidence interval for odds ratio
7upper bound of 95% confidence interval for odds ratio
